# Supplementary material
Source: MDPI journal article supplement (https://www.mdpi.com/2673-7116/4/1/5)
Supplement: s1 [file s1]

## Supplementary Data S1

**Table S1. Demographic details of participants.**

| Characteristics                  | Sample Population |      | Male |      | Female |      |
|----------------------------------|-------------------|------|------|------|--------|------|
|                                  | N                 | %    | N    | %    | N      | %    |
| <b>Age</b>                       |                   |      |      |      |        |      |
| 25-35 years                      | 49                | 45.4 | 19   | 41.2 | 30     | 48.4 |
| 36-45 years                      | 35                | 32.4 | 13   | 28.3 | 22     | 35.5 |
| 46-55 years                      | 15                | 13.9 | 9    | 19.6 | 6      | 9.7  |
| More than 55 years               | 9                 | 8.3  | 5    | 10.9 | 4      | 6.4  |
| <b>Profession</b>                |                   |      |      |      |        |      |
| Counsel                          | 34                | 31.5 | 14   | 30.4 | 20     | 32.3 |
| Attorney                         | 19                | 17.6 | 8    | 17.4 | 11     | 17.7 |
| Compliance Officer               | 10                | 9.3  | 5    | 10.9 | 5      | 8.1  |
| Legal Executive                  | 15                | 13.9 | 6    | 13   | 9      | 14.5 |
| Others                           | 30                | 27.8 | 13   | 28.3 | 17     | 27.4 |
| <b>Organization</b>              |                   |      |      |      |        |      |
| Public                           | 44                | 40.7 | 15   | 32.6 | 29     | 46.8 |
| Private                          | 35                | 32.4 | 21   | 45.7 | 14     | 22.6 |
| Parastatal                       | 13                | 12   | 4    | 8.7  | 9      | 14.5 |
| Own Practice/ Others             | 16                | 14.8 | 6    | 13   | 10     | 16.1 |
| <b>Experience in Negotiation</b> |                   |      |      |      |        |      |
| < 1 year                         | 21                | 19.4 | 7    | 15.2 | 14     | 22.6 |
| 1-5 years                        | 41                | 38   | 17   | 37   | 24     | 38.7 |
| 6-10 years                       | 20                | 18.5 | 7    | 15.2 | 13     | 21   |
| > 10 years                       | 26                | 24.1 | 15   | 32.6 | 11     | 17.7 |

Data presented as a percentage (%) of the total number per category; Total number of participants in the study (n = 108); Gender representation: male, n = 46, and female, n = 62.

## Supplementary Data S2

**Table S2. Comparative analysis between gender and personality traits.**

| Personality Traits       | Gender |        | Asymp. Sig (2-Sided) |
|--------------------------|--------|--------|----------------------|
|                          | Male   | Female |                      |
| <b>Openness</b>          | 55.53  | 53.73  | 0.766                |
| <b>Conscientiousness</b> | 43.66  | 62.54  | 0.002 **             |
| <b>Extraversion</b>      | 55.53  | 53.73  | 0.766                |
| <b>Agreeableness</b>     | 48.47  | 58.98  | 0.083                |
| <b>Neuroticism</b>       | 42.02  | 63.76  | 0.000 ***            |

Gender data is presented as mean rank. \*\* and \*\*\* significant levels capped at 0.01 and 0.001 respectively.

## Supplementary Data S3

**Table S3. Predominant personality traits depicted across Participants.**

| Item No.               | Items                                                 | Mean  |        |      | A * (%) | I * (%) |
|------------------------|-------------------------------------------------------|-------|--------|------|---------|---------|
|                        |                                                       | Total | Female | Male |         |         |
| OPENNESS TO EXPERIENCE |                                                       |       |        |      |         |         |
| 5                      | Have a vivid imagination                              | 3.55  | 3.77   | 3.24 | 63.0    | 15.7    |
| 10                     | Am not interested in abstract ideas                   | 2.94  | 2.89   | 3.00 | 32.4    | 24.1    |
| 15                     | Have difficulty understanding abstract ideas          | 3.33  | 3.05   | 3.72 | 11.1    | 37.0    |
| 20                     | Do not have a good imagination                        | 3.81  | 3.84   | 3.78 | 6.5     | 66.7    |
|                        | Subscale Score                                        | 3.41  | 3.39   | 3.45 |         |         |
| CONSCIENTIOUSNESS      |                                                       |       |        |      |         |         |
| 3                      | Get chores done right away                            | 3.48  | 3.98   | 2.80 | 57.4    | 22.2    |
| 8                      | Often forget to put things back in their proper place | 3.34  | 3.55   | 3.07 | 32.4    | 53.7    |
| 13                     | Like order                                            | 3.81  | 3.95   | 3.61 | 62.0    | 7.4     |
| 18                     | Make a mess of things                                 | 3.75  | 3.84   | 3.63 | 13.0    | 67.6    |
|                        | Subscale Score                                        | 3.60  | 3.83   | 3.28 |         |         |
| EXTRAVERSION           |                                                       |       |        |      |         |         |
| 1                      | Am the life of the party                              | 3.12  | 2.95   | 3.35 | 40.7    | 31.5    |
| 6                      | Don't talk a lot                                      | 3.19  | 3.08   | 3.33 | 38.0    | 42.6    |
| 11                     | Talk to a lot of different people at parties          | 3.21  | 3.06   | 3.41 | 42.6    | 34.3    |
| 16                     | Keep in the background                                | 3.06  | 3.00   | 3.15 | 29.6    | 30.6    |
|                        | Subscale Score                                        | 3.15  | 3.02   | 3.31 |         |         |
| AGREEABLENESS          |                                                       |       |        |      |         |         |
| 2                      | Sympathize with others' feelings                      | 3.84  | 4.06   | 3.54 | 68.5    | 12.0    |
| 7                      | Am not interested in other people's problems          | 3.05  | 3.18   | 2.87 | 38.0    | 36.1    |
| 12                     | Feel others' emotions                                 | 3.62  | 3.79   | 3.39 | 54.6    | 10.2    |
| 17                     | Am not really interested in others                    | 3.28  | 3.29   | 3.26 | 29.6    | 44.4    |
|                        | Subscale Score                                        | 3.45  | 3.58   | 3.27 |         |         |
| NEUROTICISM            |                                                       |       |        |      |         |         |
| 4                      | Have frequent mood swings                             | 2.87  | 3.19   | 2.43 | 30.6    | 36.1    |
| 9                      | Am relaxed most of the time                           | 2.32  | 2.53   | 2.04 | 64.8    | 13.9    |
| 14                     | Get upset easily                                      | 2.85  | 3.16   | 2.43 | 25.9    | 35.2    |
| 19                     | Seldom feel blue                                      | 3.40  | 3.21   | 3.65 | 20.4    | 50.0    |
|                        | Subscale Score                                        | 2.86  | 3.02   | 2.64 |         |         |

Data presented as weighted means for responses measured off a scale of a 5-point Likert scale (1 = Very inaccurate to 5 = very accurate); \* A = *Accurate*; I = *Inaccurate*).

# Supplementary Data S4

**Table S4. The perception of Women in equal or empowered roles in the workplace.**

| Item No.                                                      | Items                                                                                                       | Mean  |        |      | A * (%) | D * (%) |
|---------------------------------------------------------------|-------------------------------------------------------------------------------------------------------------|-------|--------|------|---------|---------|
|                                                               |                                                                                                             | Total | Female | Male |         |         |
| Factor 1: Acceptance of women in key positions                |                                                                                                             |       |        |      |         |         |
| 4                                                             | Men and Women should be given equal opportunities for participation in management training programmes.      | 6.45  | 6.77   | 6.02 | 94.5    | 3.7     |
| 5                                                             | Women have the capability to acquire the necessary skills to be successful managers.                        | 6.32  | 6.63   | 5.91 | 92.5    | 2.8     |
| 8                                                             | The development community should someday accept women in key managerial positions.                          | 6.35  | 6.71   | 5.87 | 95.4    | 1.8     |
| 10                                                            | It is acceptable for women to compete with men for top executive positions.                                 | 6.44  | 6.63   | 6.20 | 97.3    | 0.9     |
|                                                               | Subscale Score                                                                                              | 6.39  | 6.69   | 6.00 |         |         |
| Factor 2: Enterprise features for business success            |                                                                                                             |       |        |      |         |         |
| 6                                                             | On average, women managers are less capable of contributing to an organization's overall goals than are men | 2.02  | 1.66   | 2.50 | 7.4     | 85.2    |
| 7                                                             | It is not acceptable for women to assume leadership roles as often as men                                   | 2.03  | 1.61   | 2.59 | 9.3     | 87      |
| 9                                                             | Society should regard work by female managers as valuable as work by male managers                          | 6.41  | 6.73   | 5.98 | 95.4    | 1.8     |
| 16                                                            | Women are less capable of learning mathematical and mechanical skills than men                              | 2.38  | 1.94   | 2.98 | 13.9    | 77.8    |
| 17                                                            | Women are not ambitious enough to be successful in the business world                                       | 2.01  | 1.32   | 2.93 | 11.2    | 84.3    |
| 18                                                            | Women cannot be assertive in business situations that demand it                                             | 2.12  | 1.60   | 2.83 | 13      | 81.5    |
| 19                                                            | Women possess the self-confidence required of a good leader                                                 | 6.10  | 6.42   | 5.67 | 89.9    | 5.6     |
| 20                                                            | Women are not competitive enough to be successful in the business world                                     | 2.17  | 1.76   | 2.71 | 14.9    | 80.5    |
| 21                                                            | Women cannot be aggressive in the business situations that demand it                                        | 2.45  | 1.89   | 3.22 | 17.6    | 71.2    |
|                                                               | Subscale Score                                                                                              | 3.08  | 2.77   | 3.49 |         |         |
| Factor 3: Specific barriers to access to managerial positions |                                                                                                             |       |        |      |         |         |
| 1                                                             | It is less desirable for women than men to have a job that requires responsibility                          | 2.03  | 1.79   | 2.35 | 8.4     | 85.2    |

|    |                                                                                                                                                    |             |             |             |      |      |
|----|----------------------------------------------------------------------------------------------------------------------------------------------------|-------------|-------------|-------------|------|------|
| 2  | Women have the objectivity required to evaluate business situations properly                                                                       | 6.13        | 6.39        | 5.78        | 89.8 | 2.7  |
| 3  | Challenging work is more important to men than it is to women                                                                                      | 2.33        | 1.74        | 3.13        | 14.8 | 75   |
| 11 | The possibility of pregnancy does not make women less desirable employees than men                                                                 | 1.92        | 1.58        | 2.37        | 6.4  | 89   |
| 12 | Women would no more allow their emotions to influence their managerial behavior than would men                                                     | 3.75        | 3.58        | 4.11        | 42.5 | 29.7 |
| 13 | Problems associated with menstruation should not make women less desirable than men as employees                                                   | 6.04        | 6.31        | 5.67        | 86.1 | 6.5  |
| 14 | To be a successful executive, a woman does not have to sacrifice some of her femininity                                                            | 5.76        | 6.16        | 5.22        | 79.7 | 14.8 |
| 15 | On average, a woman who stays at home all the time with her children is a better mother than a woman who works outside the home at least half time | 2.61        | 2.32        | 3.00        | 14.9 | 63.9 |
|    | <b>Subscale Score</b>                                                                                                                              | <b>3.82</b> | <b>3.73</b> | <b>3.95</b> |      |      |

Data presented as weighted means for responses measured off a scale of a 7-point Likert scale (1 = strongly disagree to 7 = strongly agree); \* A = Agreement; D = Disagreement

## Supplementary Data S5

**Table S5. Stereotypical Gender Roles.**

| Items                                                       | Males |       | Female |       |
|-------------------------------------------------------------|-------|-------|--------|-------|
|                                                             | Yes   | No    | Yes    | No    |
| Judged or shamed for not being feminine or masculine enough | 14.81 | 27.78 | 38.89  | 18.52 |
| Only men should be strong, resilient and career-driven      | 1.85  | 40.74 | 0      | 57.41 |
| Only females should be emotional and caring                 | 2.78  | 39.81 | 1.85   | 55.56 |
| Only one job for each gender                                | 7.41  | 35.19 | 4.63   | 52.78 |
| Belief in traditional gender role                           | 1.85  | 40.74 | 1.85   | 55.56 |

Data presented as a percentage (%) of the total number per category; Total number of participants in the study (n = 108); Gender-based presentation: male, n = 46, and female, n = 62.

## Supplementary Data S6

**Table S6. Mapping negotiation skills score against gender and profession.**

| Proficiency in Negotiation Skills | Poor | Moderate | Excellent |
|-----------------------------------|------|----------|-----------|
| <b>Gender</b>                     |      |          |           |
| Male                              | -    | 4.63     | 37.96     |
| Female                            | -    | 13.89    | 43.52     |
| <b>Profession</b>                 |      |          |           |
| Counsel                           | -    | 4.63     | 26.85     |
| Attorney                          | -    | 1.85     | 15.74     |
| Own Practice                      | -    | 0        | 9.26      |
| Legal Executive                   | -    | 1.85     | 12.04     |
| Others                            | -    | 10.19    | 17.59     |

Data presented as a percentage (%) of the total number per category; Total number of participants in the study (n = 108); Gender-based presentation: male, n = 46, and female, n = 62; Score categories; poor = 0 to 39; moderate = 40 to 69; excellent = 70 to 100. No respondents rated themselves as poor in negotiation skills.

## Supplementary Data S7

**Table S7. Predominant personality traits across gender and negotiation skills.**

| Predominant Personality Traits | Negotiation Skills |           |          |           |
|--------------------------------|--------------------|-----------|----------|-----------|
|                                | Male               |           | Female   |           |
|                                | Moderate           | Excellent | Moderate | Excellent |
| Openness to Experience         | 1.9                | 14.8      | 3.7      | 9.2       |
| Conscientiousness              | 2.8                | 10.2      | 4.6      | 28.7      |
| Extraversion                   | 0                  | 0         | 0        | 0.9       |
| Agreeableness                  | 0                  | 10.2      | 3.7      | 3.7       |
| Neuroticism                    | 0                  | 2.8       | 1.9      | 0.9       |

Data presented as a percentage (%) of the total number per category; Total number of participants in the study (n = 108); Gender-based presentation: male, n = 46, and female, n = 62; Score categories; poor = 0 to 39; moderate = 40 to 69; excellent = 70 to 100. No respondents rated themselves as poor in negotiation skills.

## Supplementary Data S8

**Table S8. Negotiation outcomes across predominant personality traits.**

| Predominant Personality Traits | Negotiation Outcome |         |          |
|--------------------------------|---------------------|---------|----------|
|                                | Negative            | Neutral | Positive |
| Openness to Experience         | 0                   | 0.6     | 24.1     |
| Conscientiousness              | 0.8                 | 2.8     | 35.2     |
| Extraversion                   | 0                   | 0       | 0.9      |
| Agreeableness                  | 0.6                 | 3.7     | 0.8      |
| Neuroticism                    | 0.9                 | 1.9     | 2.8      |

Data presented as a percentage (%) of the total number per category; Total number of participants in the study (n = 108).
